# Supplementary material for: One-pot synthesis of lignin-stabilised platinum and palladium nanoparticles and their catalytic behaviour in oxidation and reduction reactions
Source: Royal Society of Chemistry journal article supplement (doi:10.1039/c2gc16524d), 2012-01-01
Supplement: c2gc16524d.pdf [file c2gc16524d.pdf]

## **Supplementary material for**

# **One-pot synthesis of lignin-stabilised platinum and palladium nanoparticles and their catalytic behaviour in oxidation and reduction reactions**

**Francesca Coccia,<sup>a</sup> Lucia Tonucci,<sup>b</sup> Domenico Bosco,<sup>c</sup> Mario Bressan<sup>d</sup> and Nicola d'Alessandro<sup>\*d</sup>**

<sup>a</sup> *Department of Science, "G.D'Annunzio" University of Chieti and Pescara, Viale Pindaro, 42, I-65127 Pescara, Italy*

<sup>b</sup> *Department of Philosophy, Human and Educational Sciences, "G.D'Annunzio" University of Chieti and Pescara, Via dei Vestini, I-66013, Chieti Scalo, Italy.*

<sup>c</sup> *Department of Biomorphological Science, Molecular Genetic Institute, CNR, Via dei Vestini, I-66013, Chieti Scalo, Italy.*

<sup>d</sup> *Department of Engineering and Geotechnology, "G.D'Annunzio" University of Chieti and Pescara, Viale Pindaro, 42, I-65127 Pescara, Italy. Fax: +39-0871-3555364; Tel: +0871-3555365; E-mail: [dalessan@unich.it](mailto:dalessan@unich.it).*

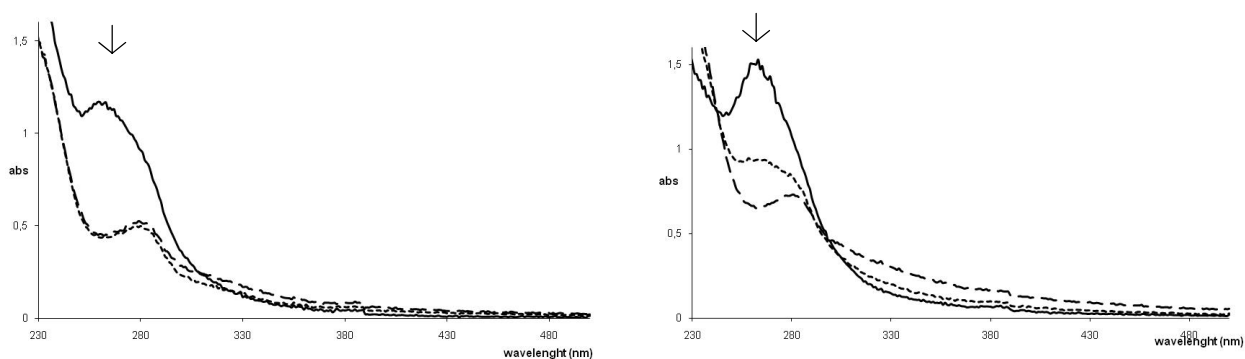

**Figure S1.** UV- vis spectra acquired (0 h, solid lines; 0.5 h, short-dashed lines; 4 h, long-dashed lines) during the formation of Pt NPs in the presence of CaLig (left) and AmLig (right). The absorption of Pt<sup>IV</sup> at 258 nm disappears when the NPs were formed. Note the absorption at 280 nm attributable to the aromatic moieties of lignins.

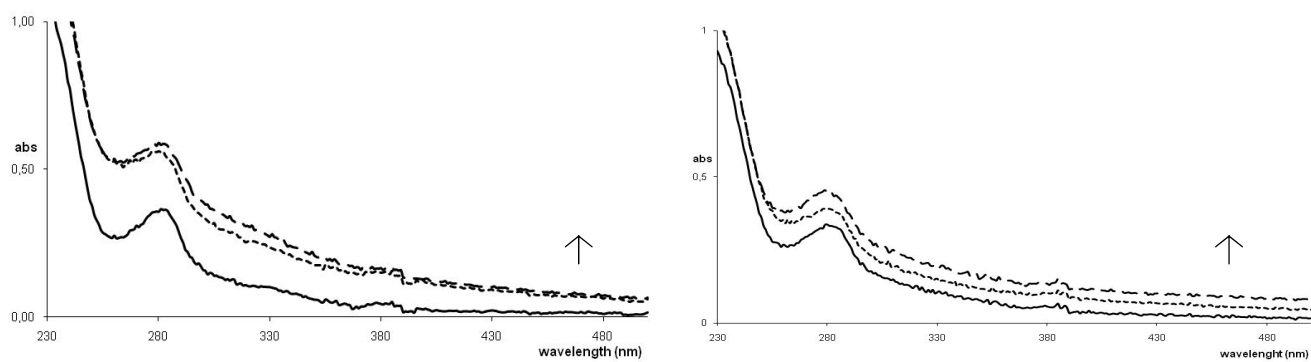

**Figure S2.** UV-vis spectra acquired (0, solid lines; 0.5 h, short-dashed lines; 4 h, long-dashed lines) during the formation of Pd NPs in the presence of CaLig (left) and AmLig (right).

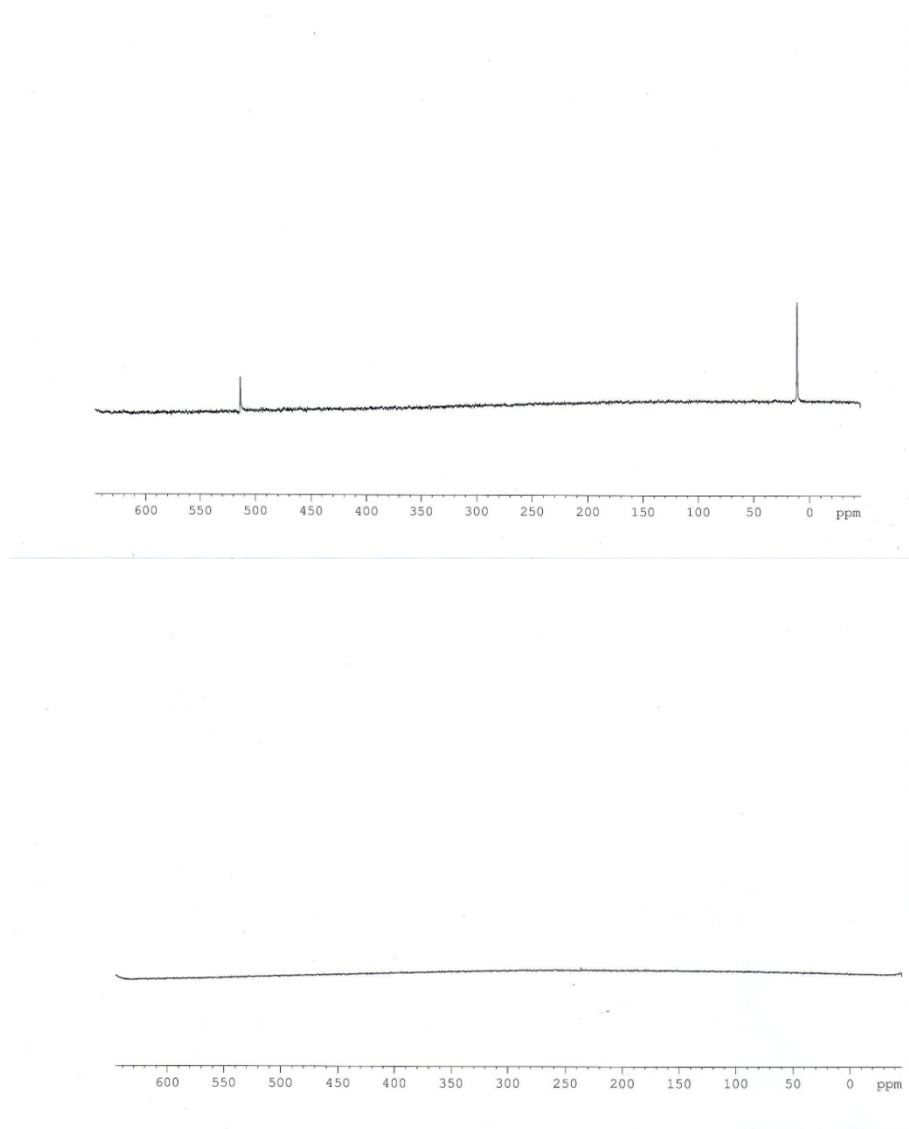

**Figure S3.**  $^{195}\text{Pt}$  NMR spectra of a saturated water solution of  $\text{PtCl}_6^{2-}$  (top) and a six-fold concentrated solution of Pt NP solutions (bottom).

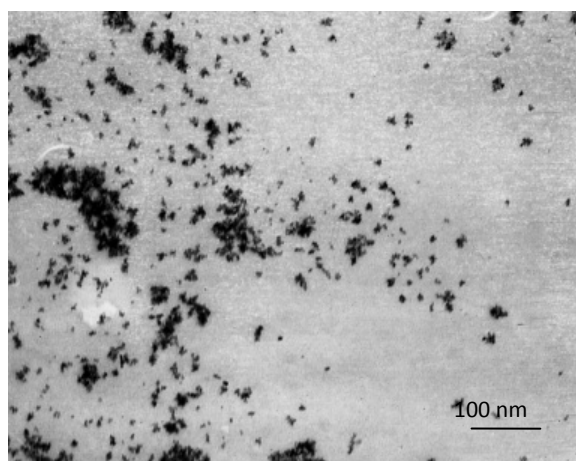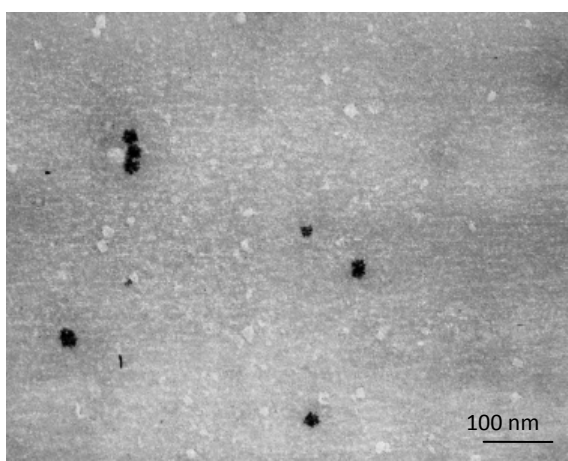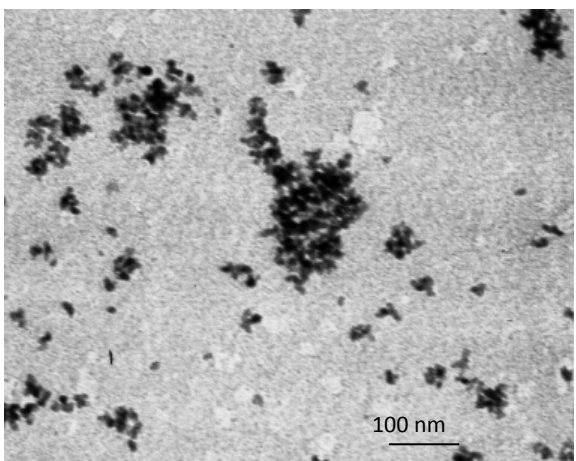

**Figure S4.** TEM images of AmLig Pt NPs (top, left), CaLig Pt NPs (top, right) and fulvic acid Pt NPs (bottom).

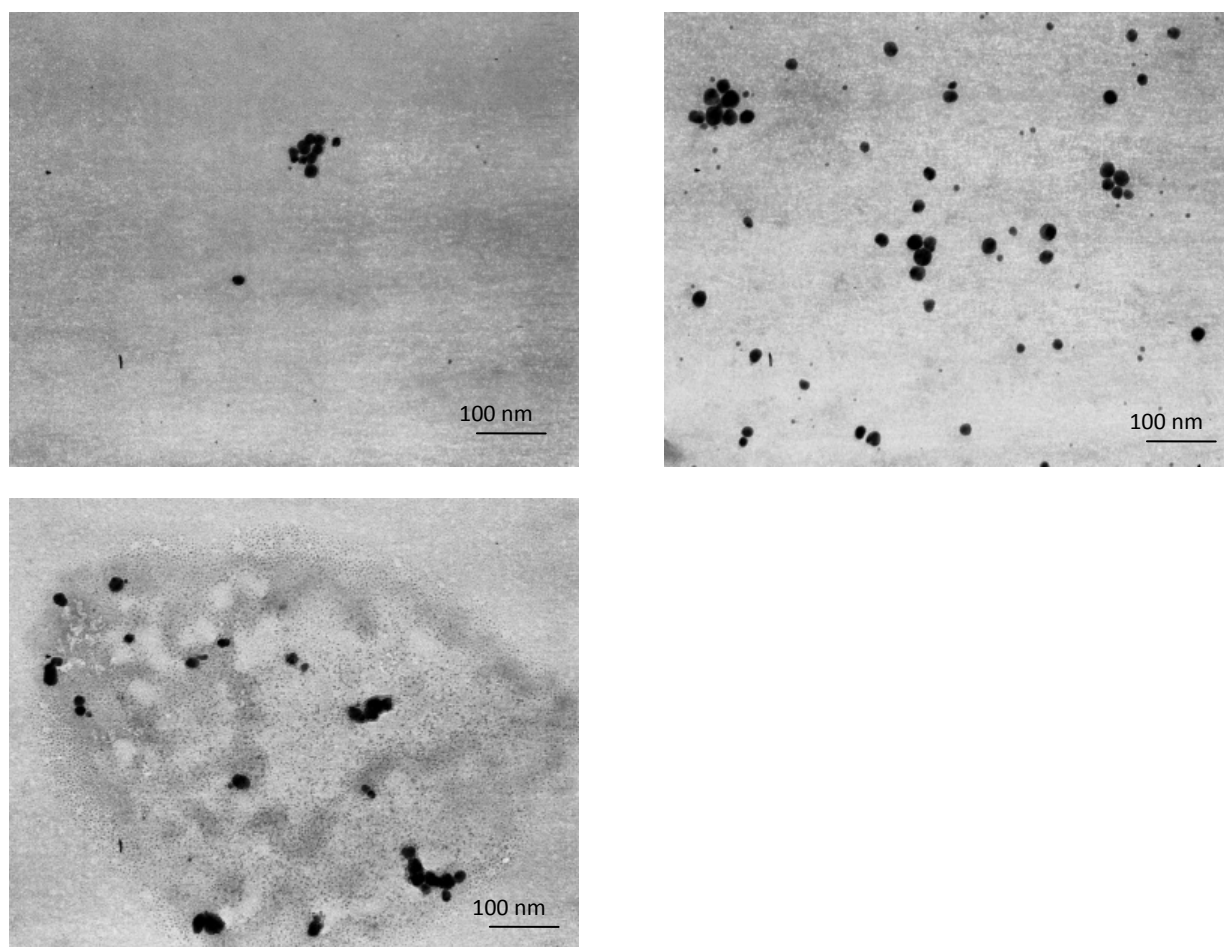

**Figure S5.** TEM images of AmLig Pd NPs (top, left), CaLig Pd NPs (top, right) and fulvic acid Pd NPs (bottom).

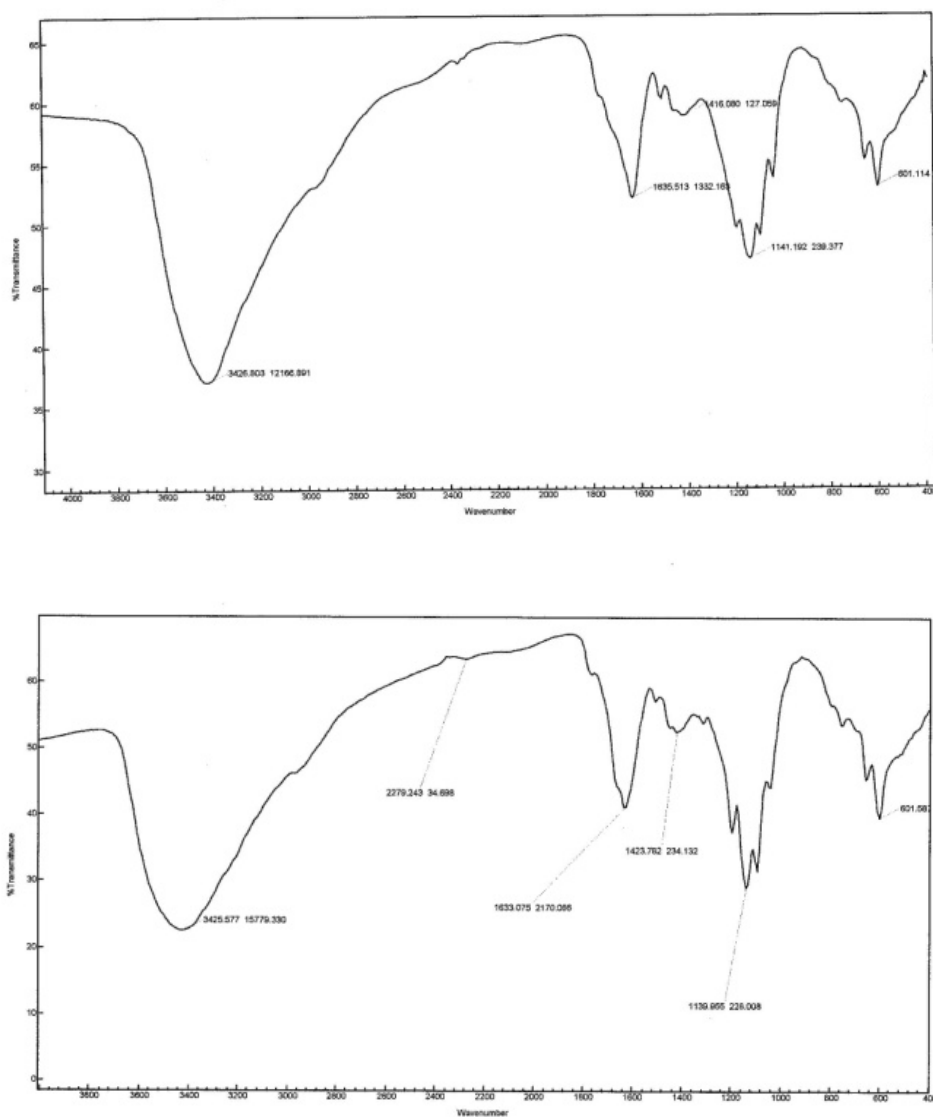

**Figure S6.** FT-IR spectrum of fulvic acid (top) and fulvic acid Pt NPs (bottom).

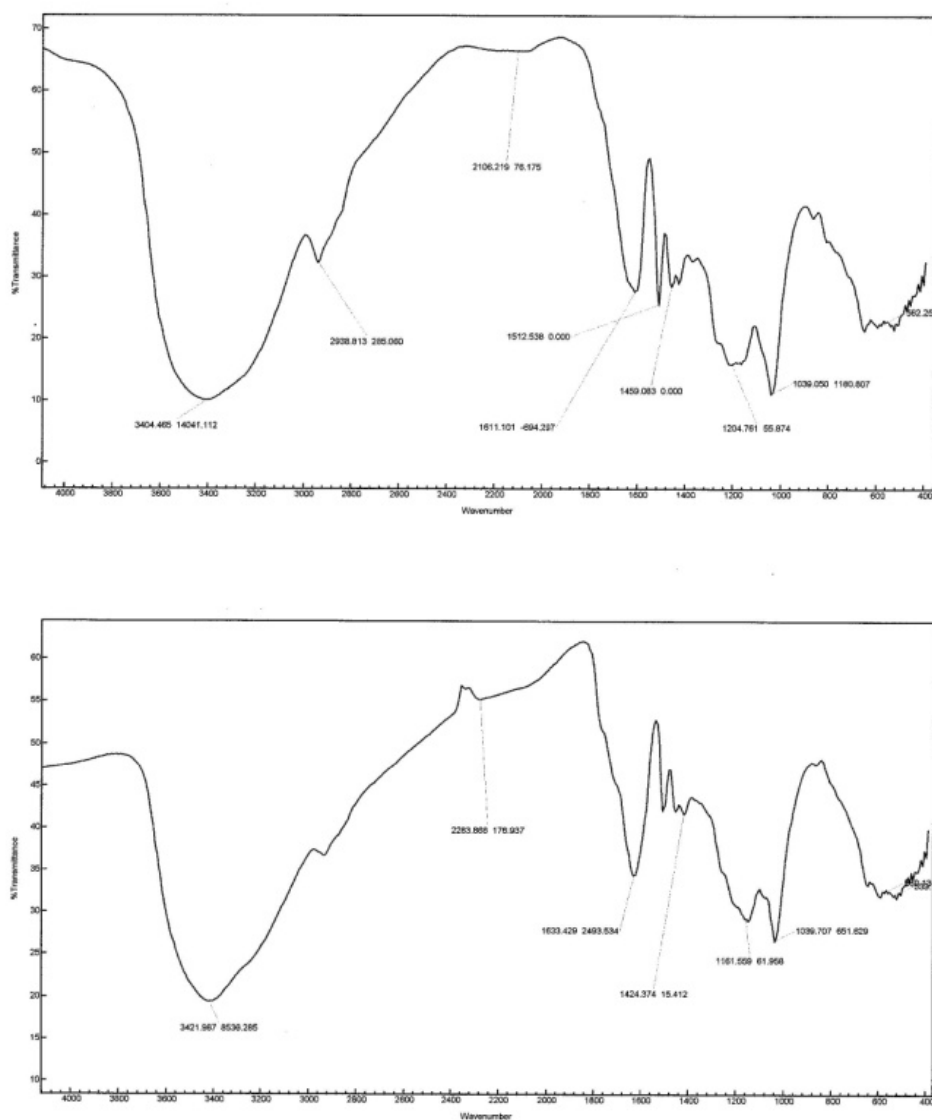

**Figure S7.** FT-IR spectra of CaLig (top) and CaLig Pt NPs (bottom).



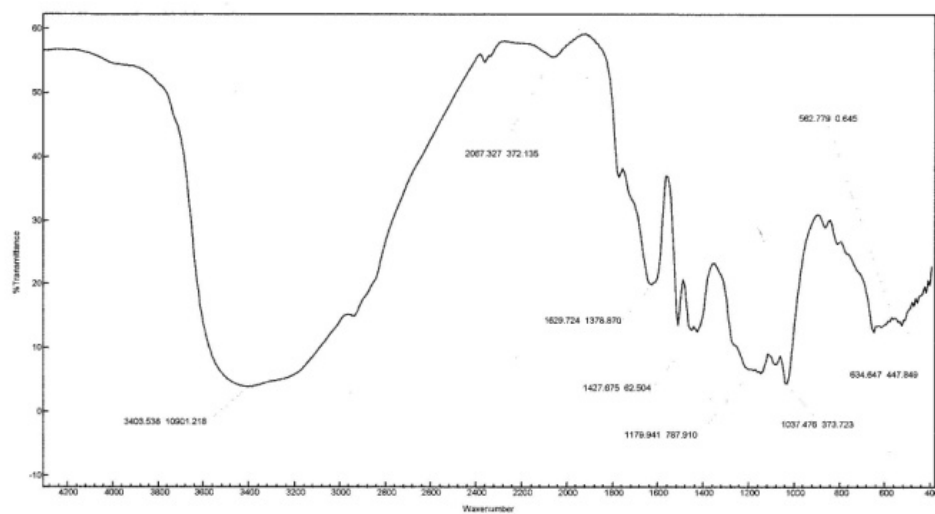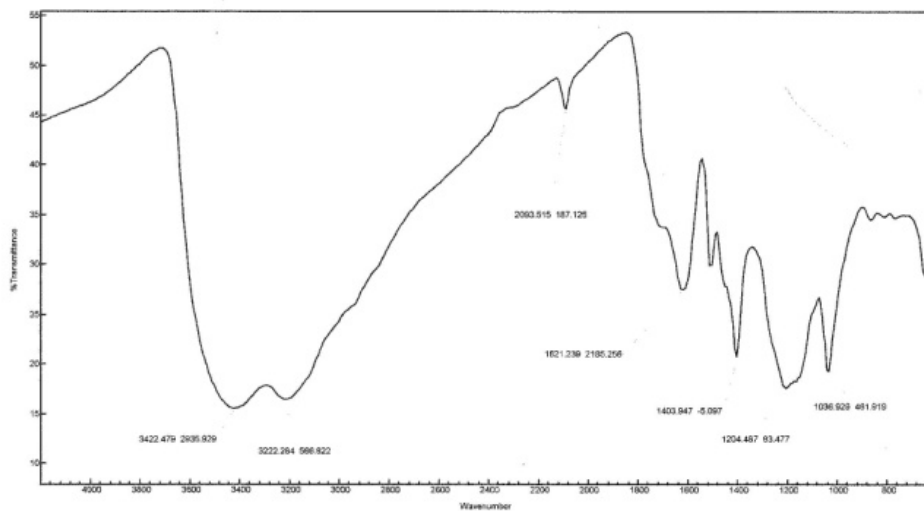

**Figure S8.** FT-IR spectra of AmLig (top) and AmLig Pt NPs (bottom).

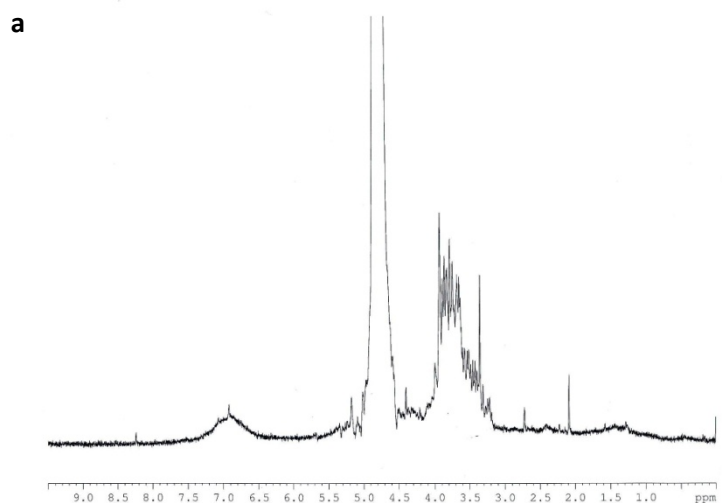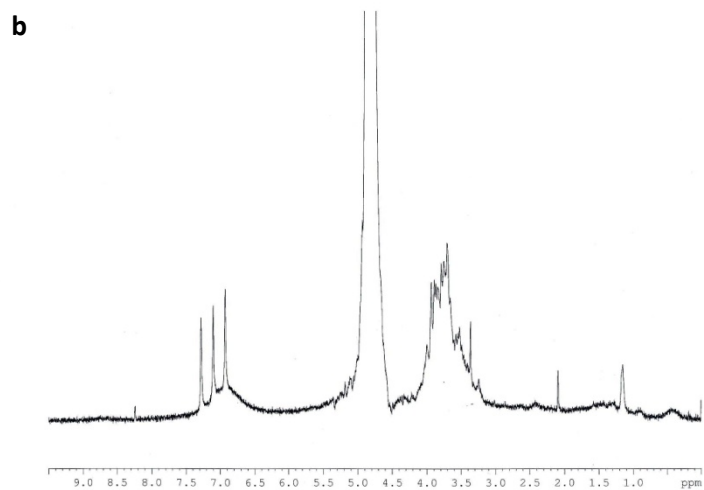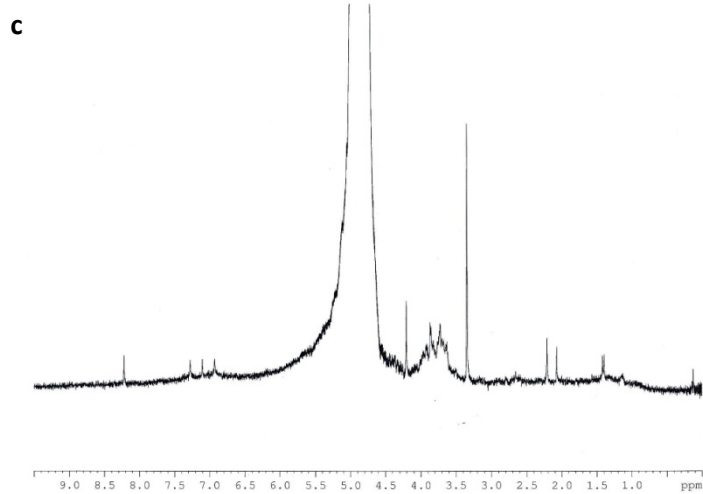

**Figure S9.**  $^1\text{H}$  NMR of solutions of CaLig Pt NPs (a), AmLig Pt NPs (b), and fulvic acid Pt NPs (c)

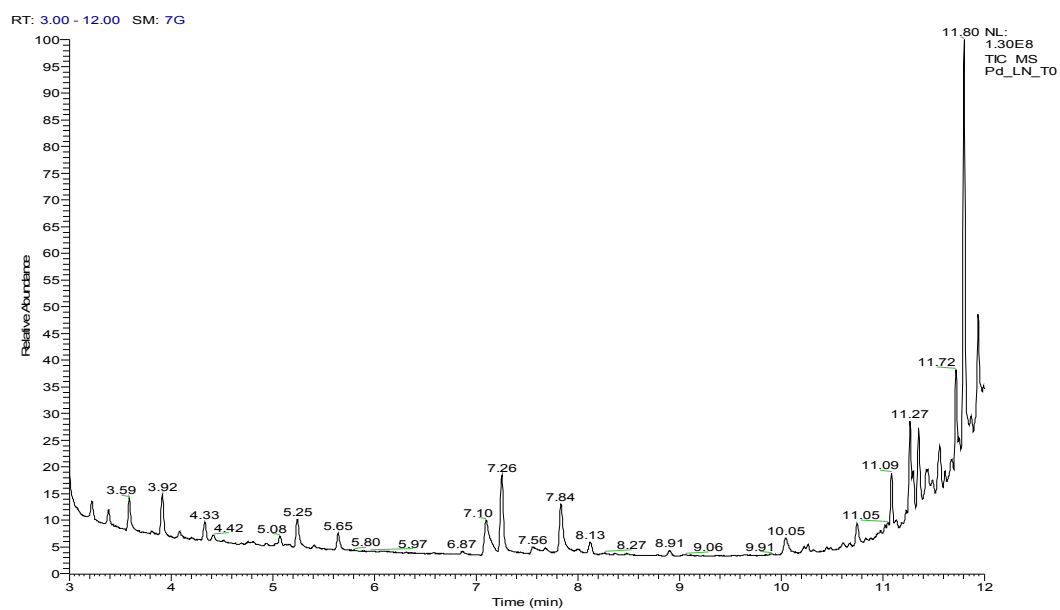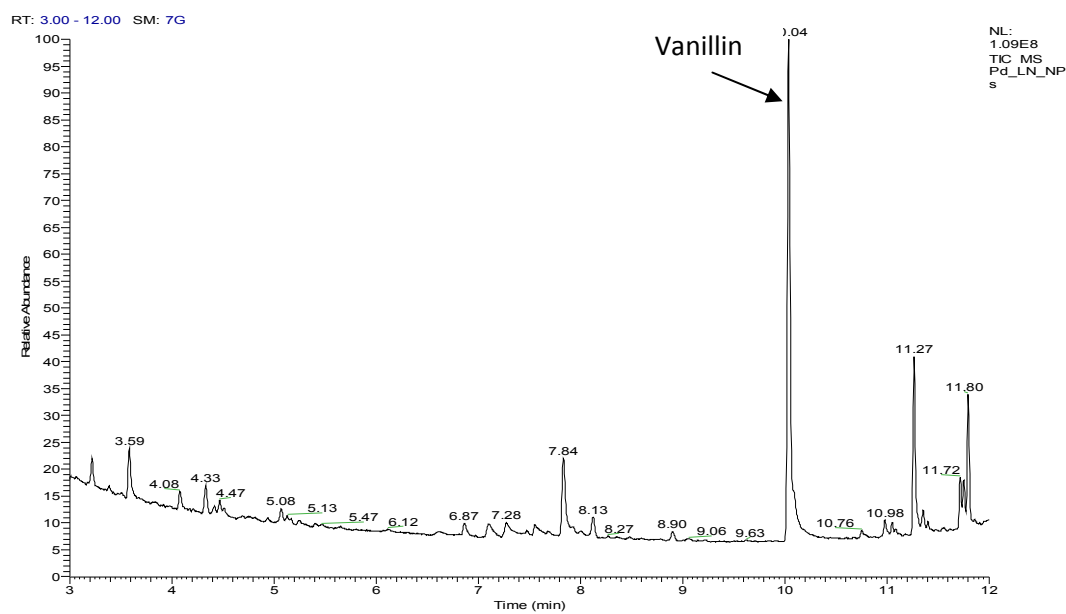

**Figure S10.** GC-MS chromatograms of chloroform extracts of AmLig solution (top) and AmLig Pd NP solution (bottom)

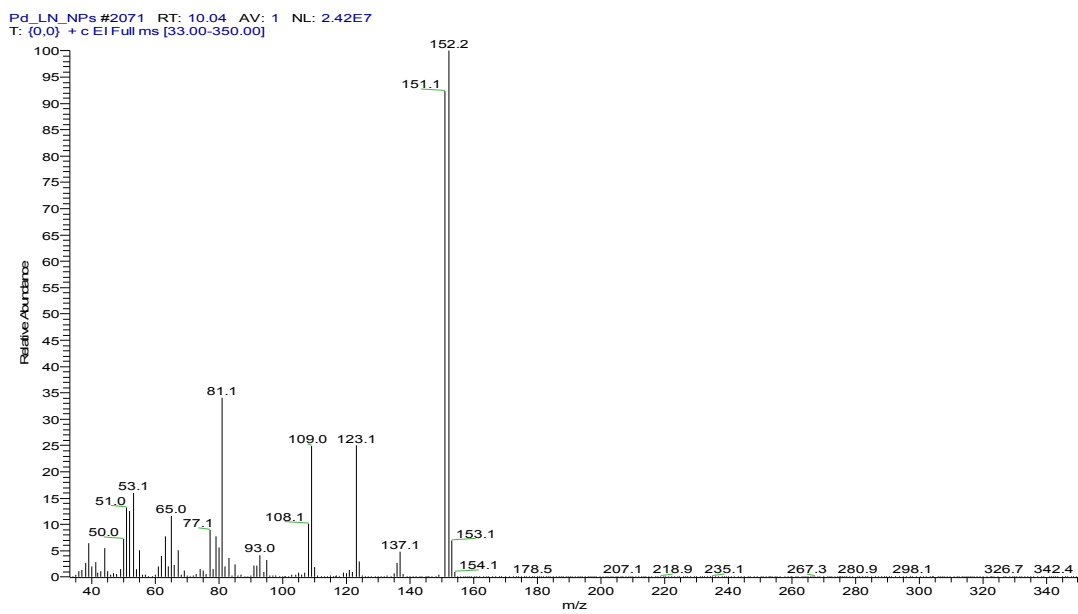

**Figure S11.** Electronic impact (70 eV) mass spectrum of vanillin.
